# Supplementary material for: Large-scale synthesis of coordination polymer microdendrites and their application as a sensing platform for fluorescent DNA detection
Source: Royal Society of Chemistry journal article supplement (doi:10.1039/c1ra00359c), 2011-01-01
Supplement: c1ra00359c.pdf [file c1ra00359c.pdf]

## Electronic Supplementary Information

# Large-scale synthesis of coordination polymer microdendrites and their application as a sensing platform for fluorescent DNA detection

Hailong Li<sup>a,b</sup>, Junfeng Zhai<sup>a</sup>, Xuping Sun<sup>a,\*</sup>

<sup>a</sup> State Key Lab of Electroanalytical Chemistry, Changchun Institute of Applied Chemistry, Changchun 130022, Jilin, P. R. China

<sup>b</sup> Chinese Academy of Sciences, Graduate School of the Chinese Academy of Sciences, Beijing 100039, P. R. China

\*Corresponding author. Tel/Fax: 0086-431-85262065. E-mail address: sunxp@ciac.jl.cn

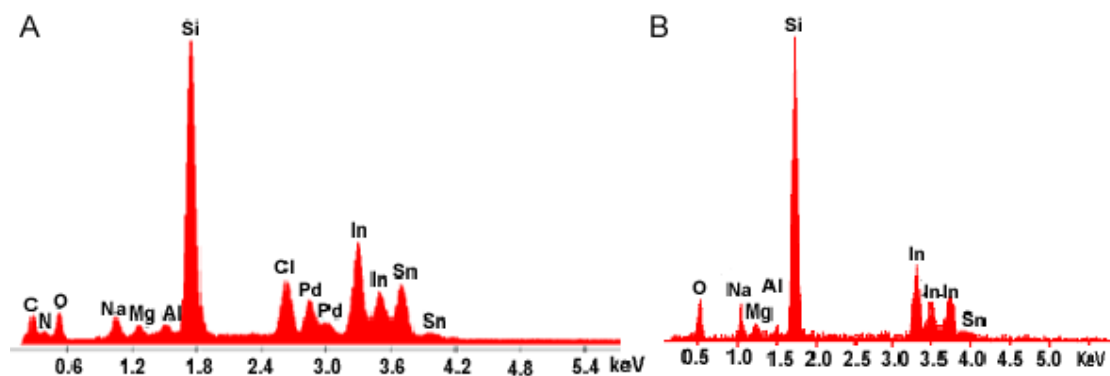

**Fig. S1.** Energy-dispersive spectrum of (A) microparticle-coated and (B) bare ITO substrate.

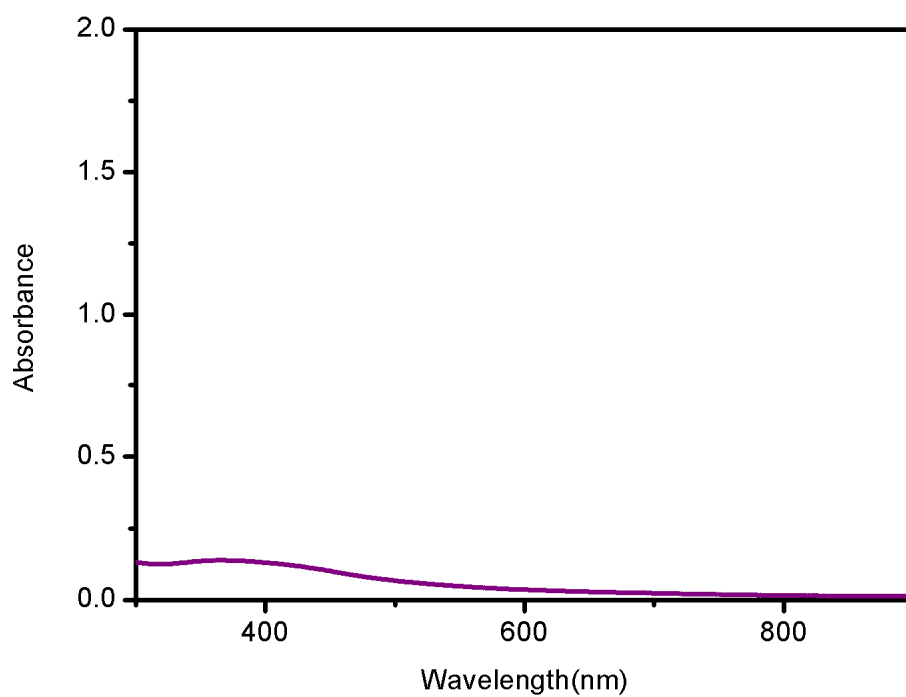

**Fig. S2.** Absorption spectrum of CPMDs dispersed in Tris-HCl buffer in the presence of 5 mM  $Mg^{2+}$  (pH 7.4).
